# Supplementary material
Source: Elsevier journal article supplement (https://comptes-rendus.academie-sciences.fr/chimie/article/10.1016/j.crci.2013.04.008/file/attach/mmc1.pdf)
Supplement: mmc1 [file mmc1.pdf]

**Effect of Physical Chemical Parameters on photocatalysis of TiO<sub>2</sub>  
anatase**

**Effet des Paramètres Physico-chimiques améliorant la photocatalyse de  
TiO<sub>2</sub> anatase**

**Aiat Hegazy, and Eric Prouzet \***

## Modelling of the photocatalytic tests

The experimental evolution of MB degradation as a function of time was fitted with a 3rd degree polynomial:

$$(a_0 + a_1.X + a_2.X^2 + a_3.X^3) \quad (1)$$

The variation of all coefficients ( $a_0$  to  $a_3$ ) was further fitted in order to provide a complete 3D map evaluation of the MB degradation as a function of time and other variables.

For each experimental curve, coefficients  $a_0$  to  $a_3$  were determined by a least square fit, and these values were used for interpolation between the experimental points. A response surface map was then calculated by using the fit equation of each coefficient.

**Table S1:** Reliability Coefficients  $R^2$  of the linear fits for the modelling of a zero-order ( $Ct=f(t)$ ), first order ( $\ln(Ct)=f(t)$ ), and second order ( $1/Ct=f(t)$ ) kinetics (Graphs in Figures S9). Fits were done within The 40-200 min time range was selected as the fitting range to avoid initial and final conditions.

| <b>TiO<sub>2</sub> (mg)</b> | <b>zero order</b> | <b>first order</b> | <b>second order</b> |
|-----------------------------|-------------------|--------------------|---------------------|
| 5                           | <b>0.986</b>      | 0.968              | 0.963               |
| 10                          | <b>0.967</b>      | 0.945              | 0.917               |
| 20                          | <b>0.966</b>      | 0.920              | 0.867               |
| 50                          | <b>0.989</b>      | 0.974              | 0.959               |
| 100                         | <b>0.872</b>      | 0.828              | 0.777               |
| 200                         | 0.981             | <b>0.982</b>       | <b>0.982</b>        |
| 300                         | <b>0.9338</b>     | 0.904              | 0.869               |

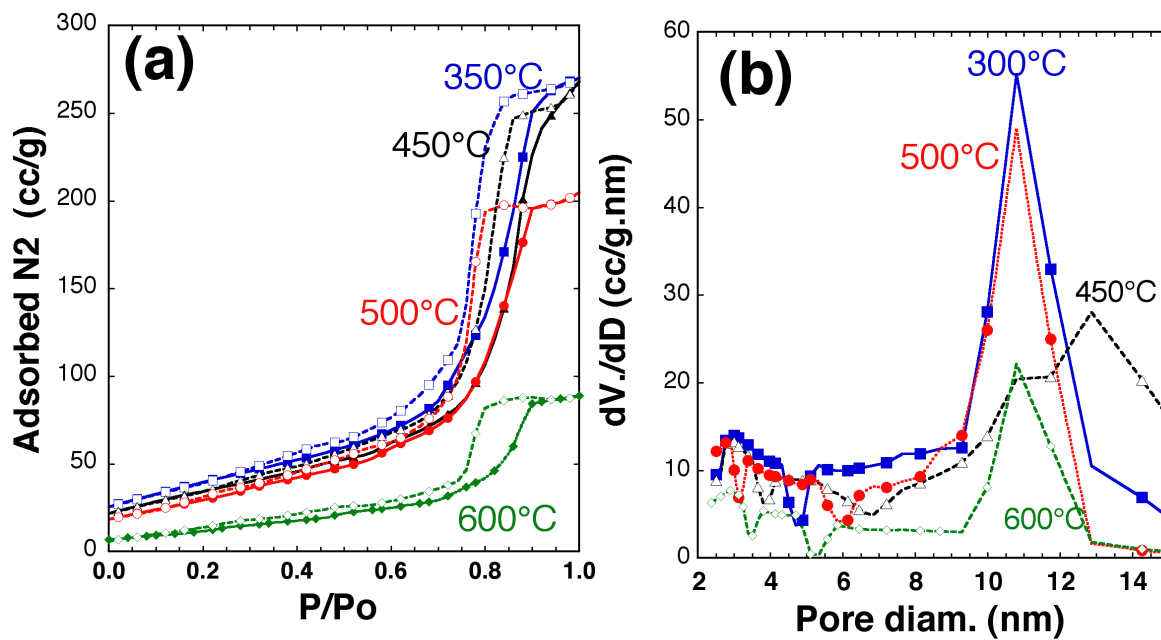

**Figure S1:** N<sub>2</sub> isotherm adsorption (a) and pore size distribution (b) for the TiO<sub>2</sub> anatase thermally treated at different temperatures.

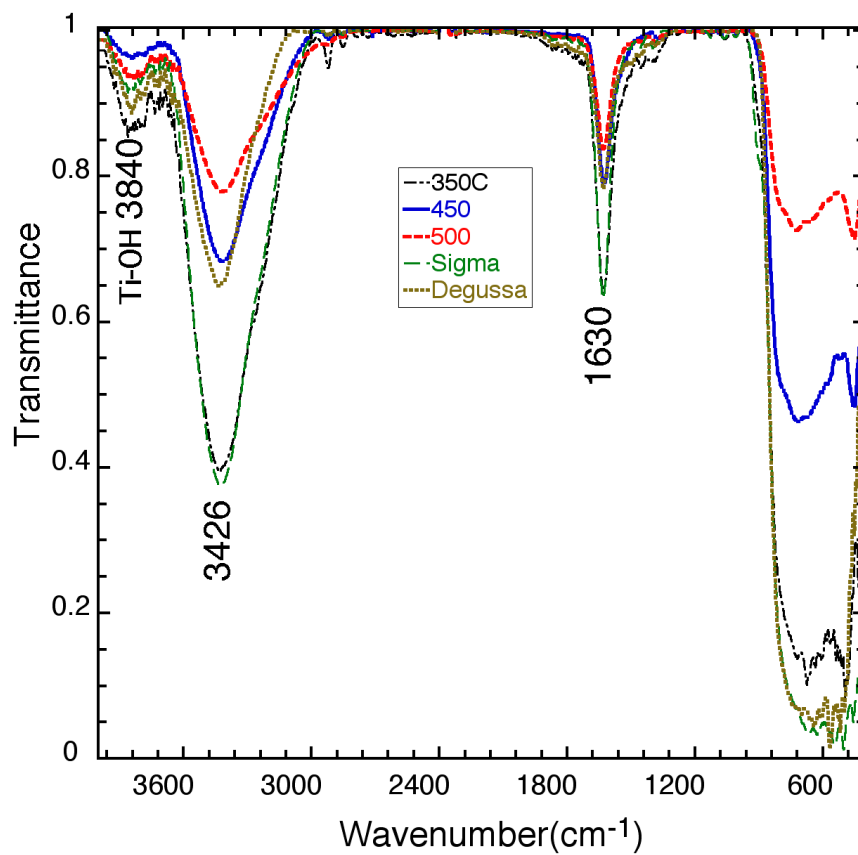

**Figure S2:** FT-IR spectra of T350, T450, T500, and Sigma and Degussa commercial TiO<sub>2</sub> powders

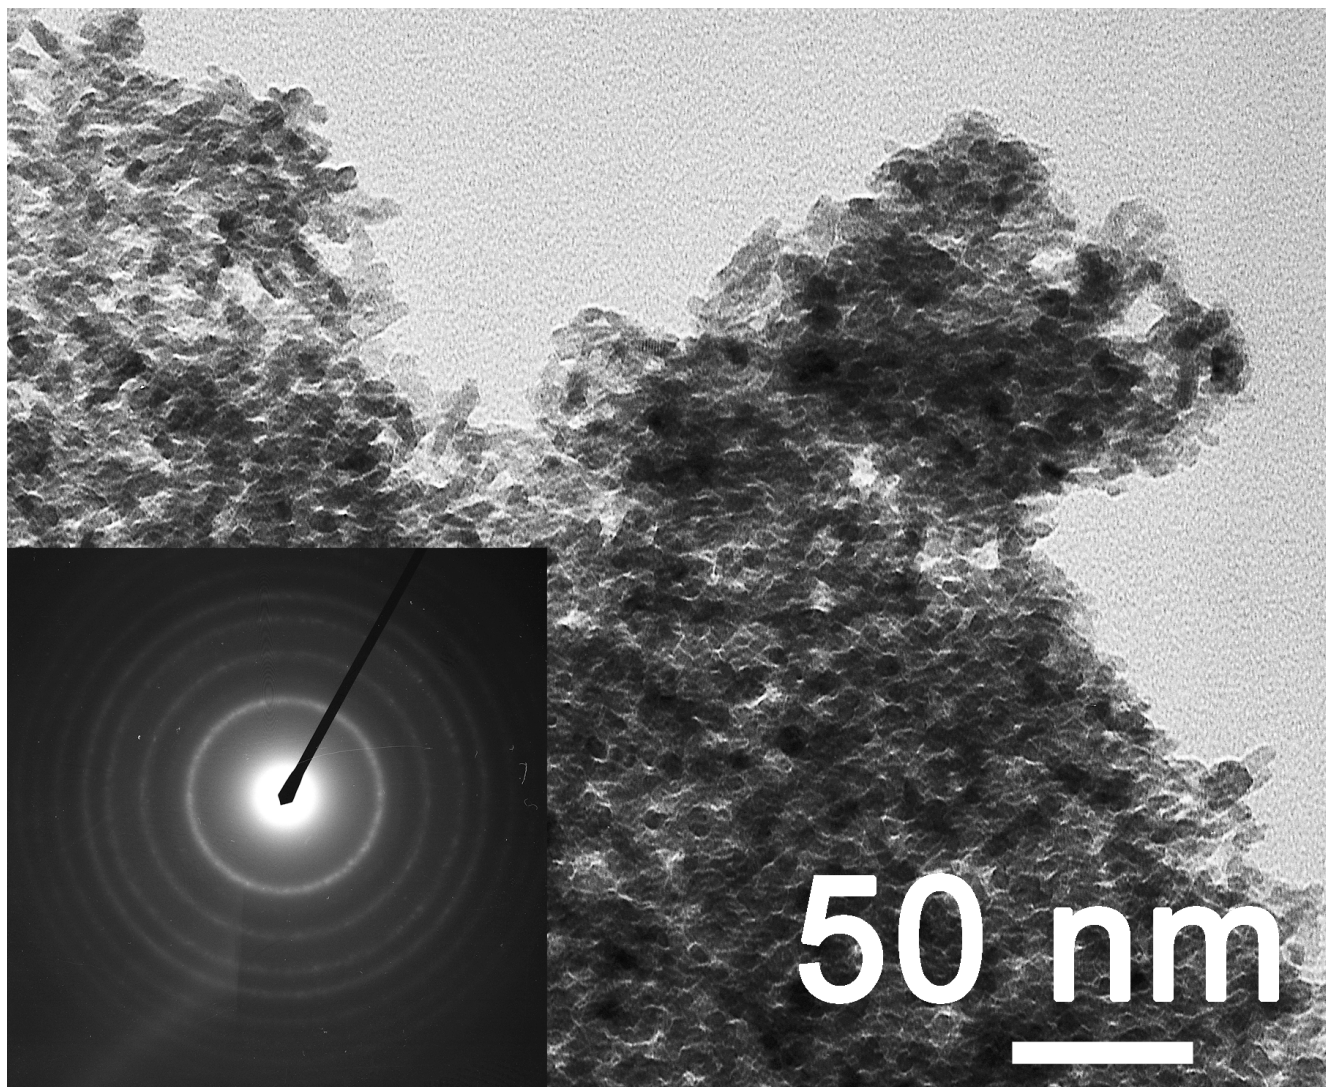

**Figure S3:** TEM micrography of RT-TiO<sub>2</sub>

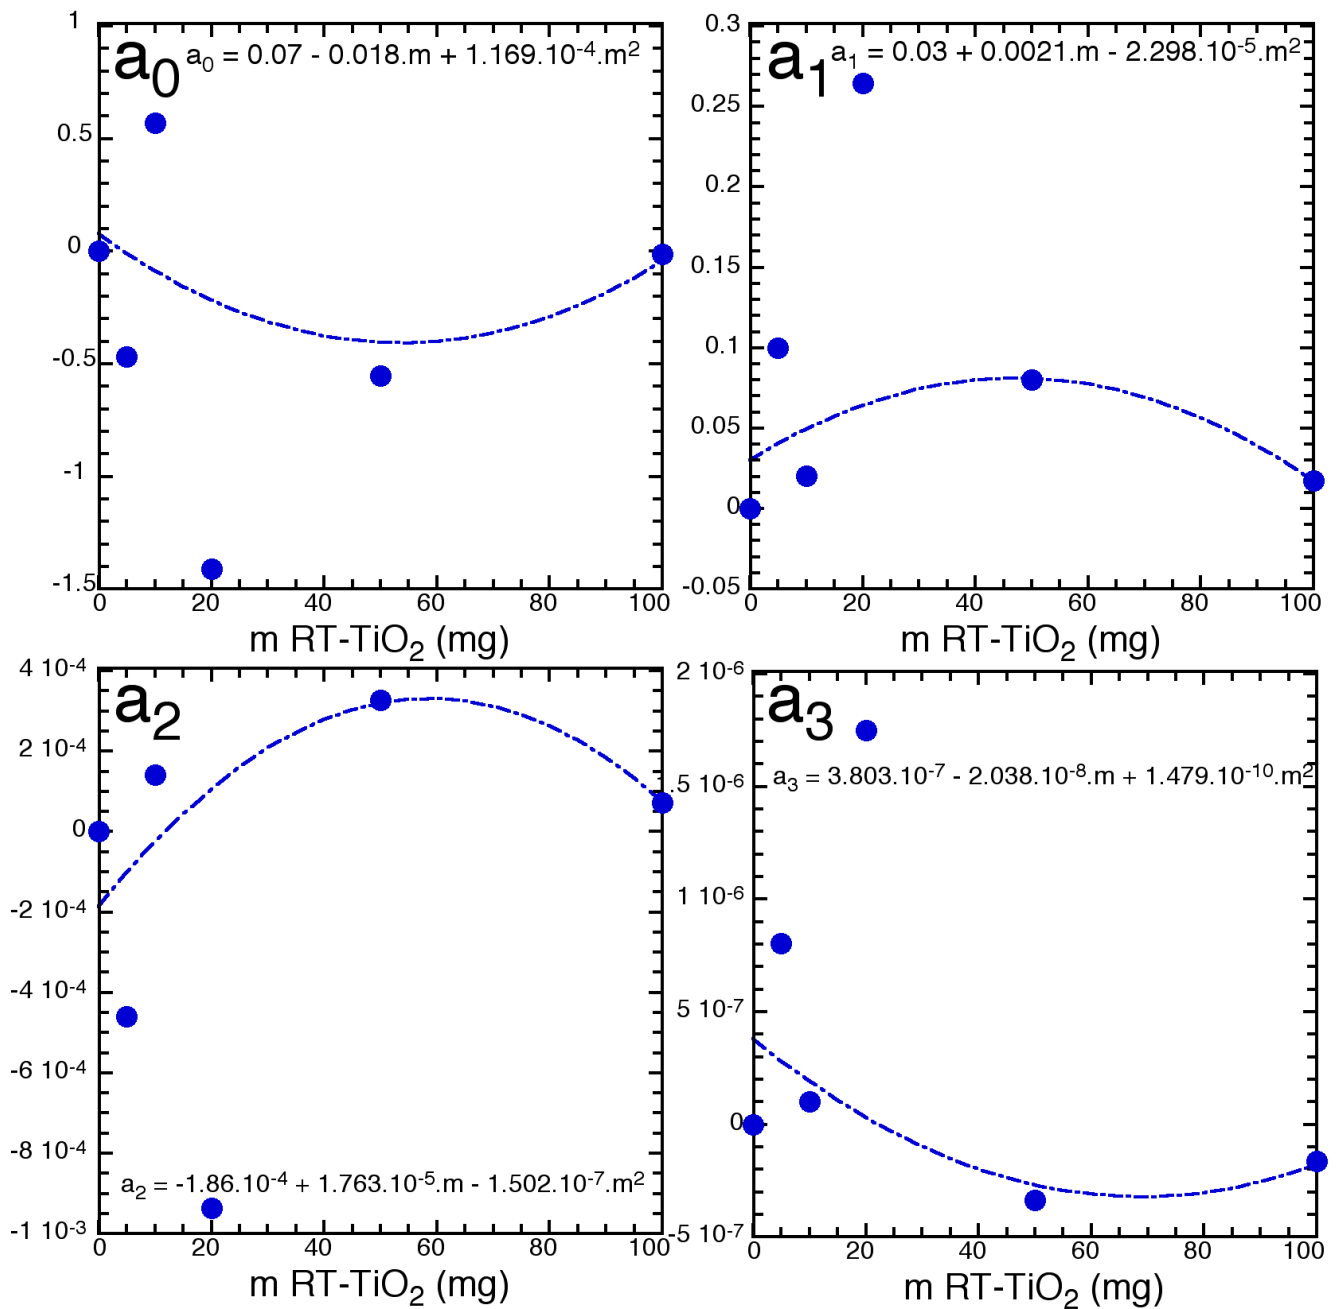

**Figure S4:** Values (dots) and 2<sup>nd</sup> order fit (dashed lines) of the polynomial parameters  $a_0(m)$  to  $a_3(m)$ , with  $m$  the mass of RT-TiO<sub>2</sub>, and the parameters  $a_0(m)$  to  $a_3(m)$  being the variable of the 3<sup>rd</sup> order degree polynomial [% (degrad) =  $a_0(m) + a_1(m) \cdot t + a_2(m) \cdot t^2 + a_3(m) \cdot t^3$ ]. Due to large discrepancy, the values of the 20 mg samples were not used for fitting.

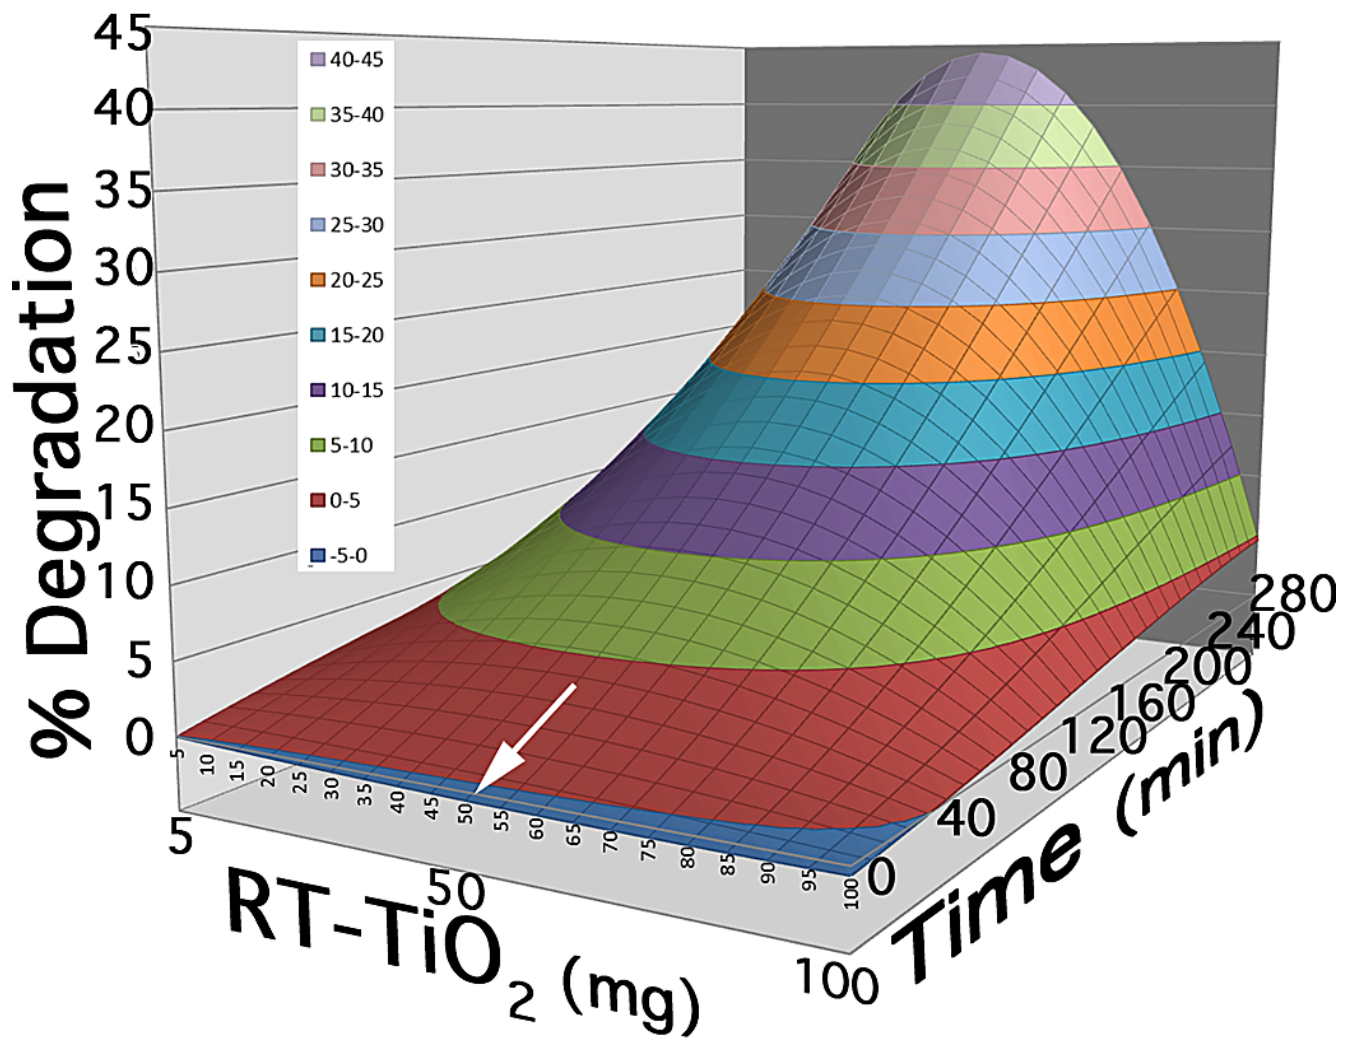

**Figure S5:** Modelling of the MB Degradation as a function of time (0 to 280 min) and mass of catalyst (5 to 100 mg), for RT-TiO<sub>2</sub>.

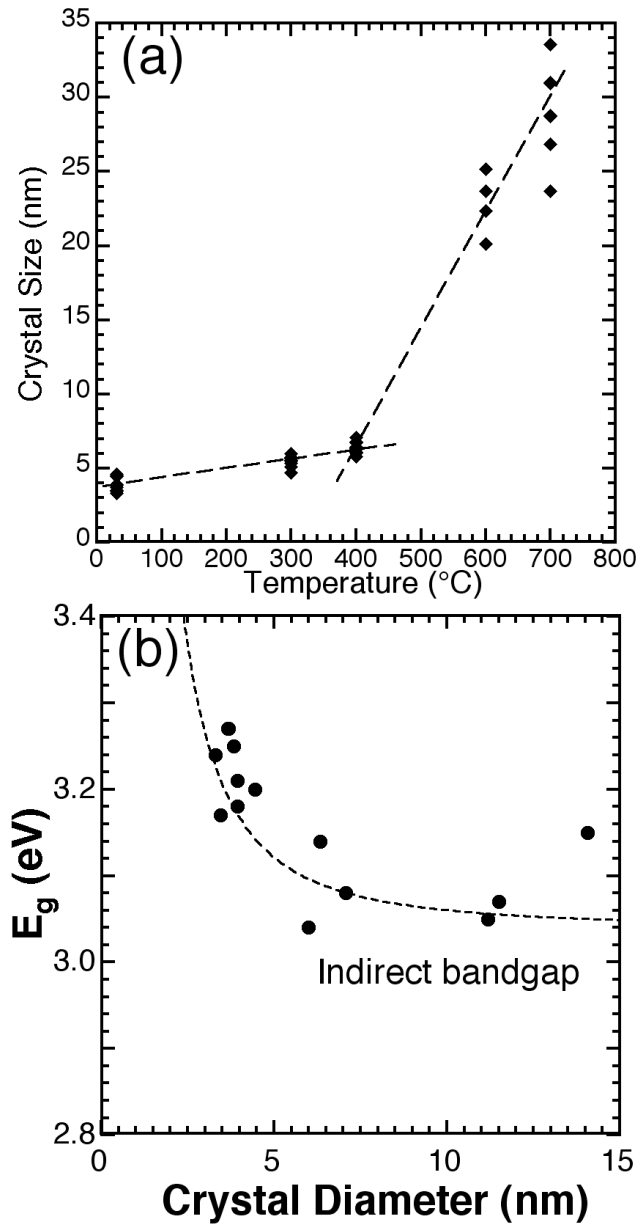

**Figure S6:** (a) Evolution of the crystal size of RT-TiO<sub>2</sub> as a function of the temperature, and (b) correlation between the measured band gap (indirect band gap model) and the crystal size.

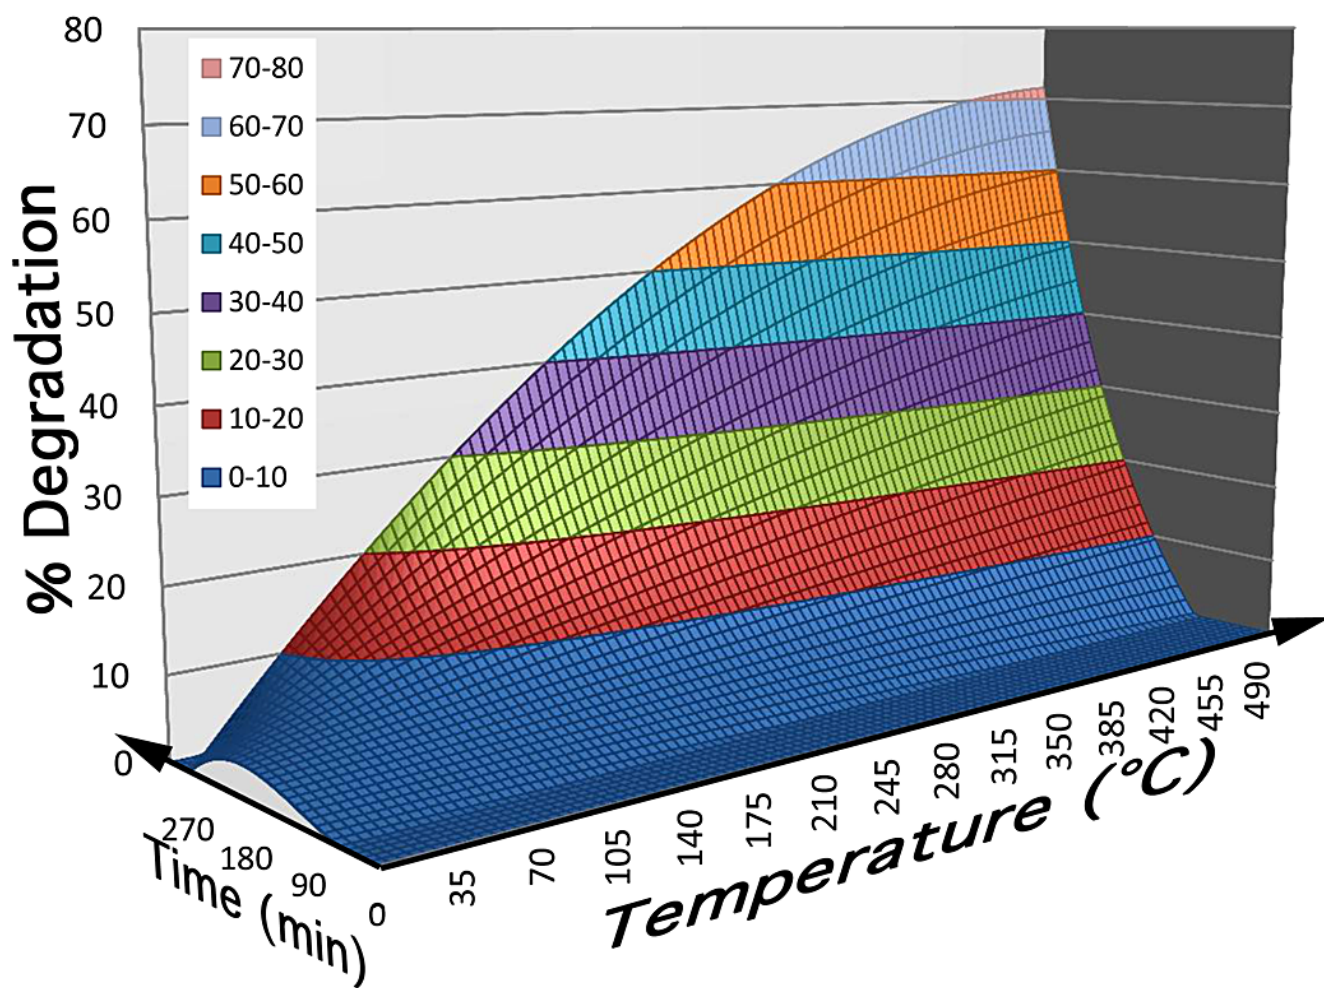

**Figure S7:** Modelling of the MB Degradation as a function of time (0 to 300 min) and temperature of catalyst activation (0 to 500°C), for an initial 100 mg RT-TiO<sub>2</sub> sample.



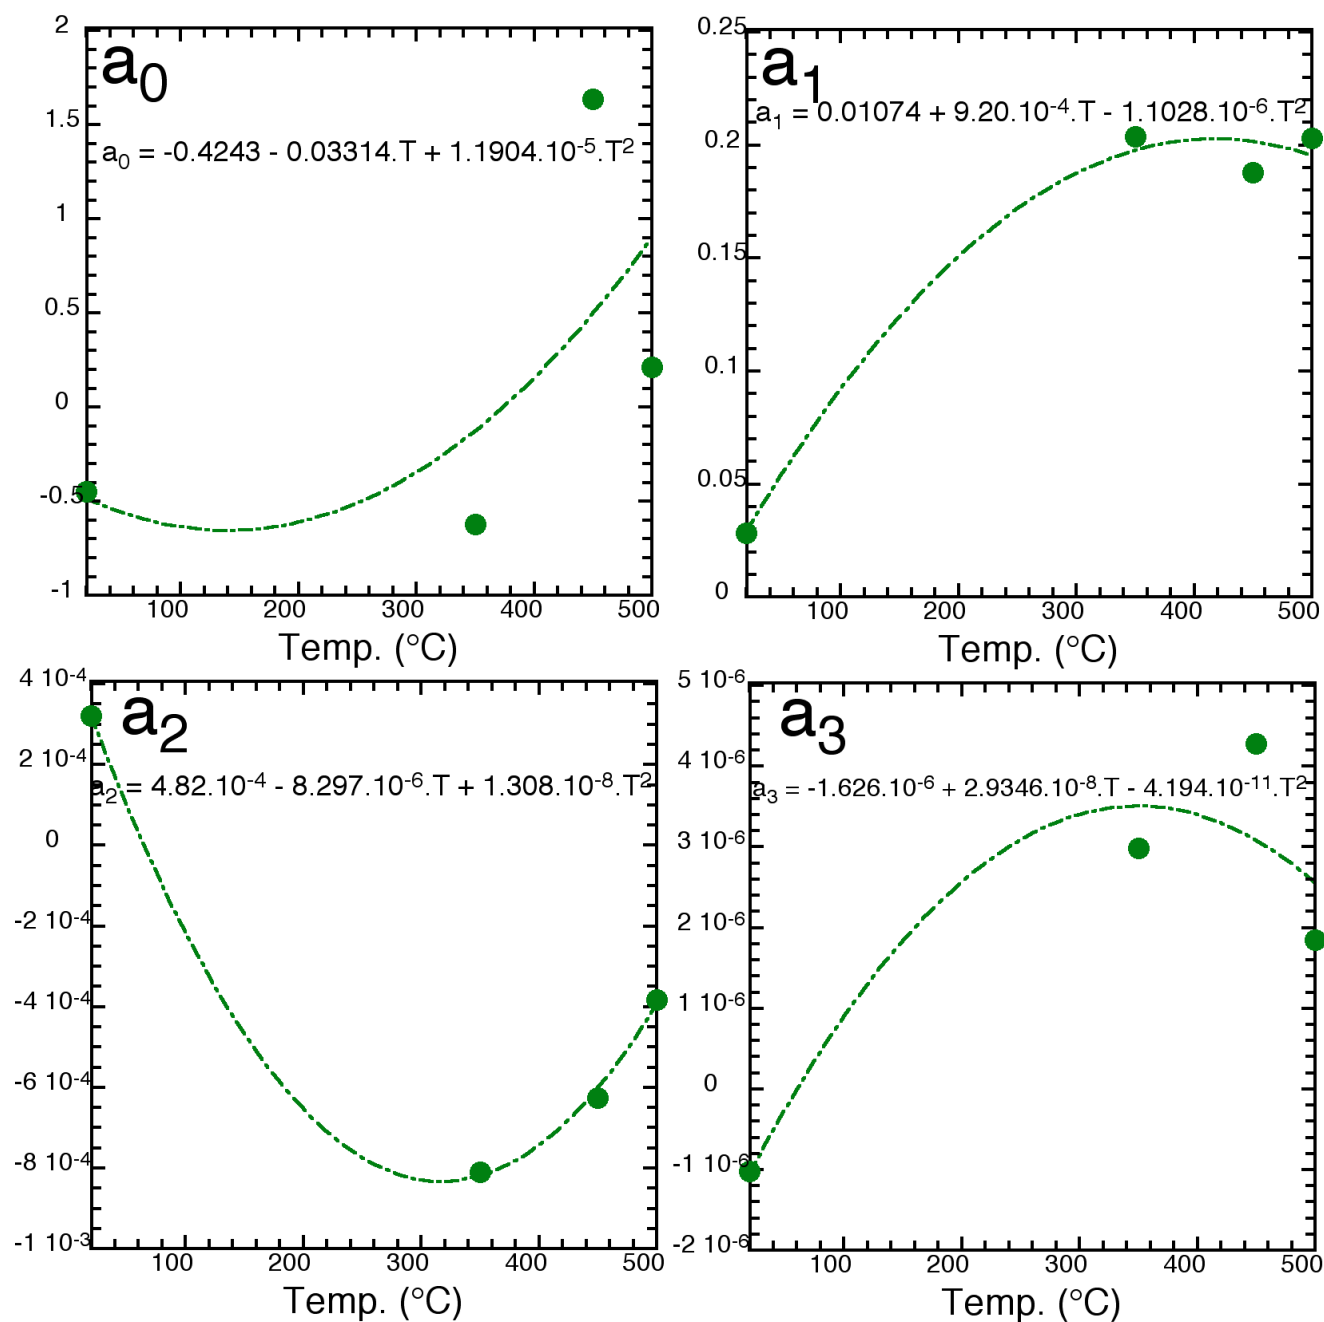

**Figure S8:** Values (dots) and 2<sup>nd</sup> order fit (dashed lines) of the polynomial parameters  $a_0(T)$  to  $a_3(T)$ , for 100 mg of RT-TiO<sub>2</sub>, activated at different temperatures.  $a_0(T)$  to  $a_3(T)$  being the variable of the 3<sup>rd</sup> order degree polynomial [% (degrad) =  $a_0(T) + a_1(T) \cdot t + a_2(T) \cdot t^2 + a_3(T) \cdot t^3$ ].

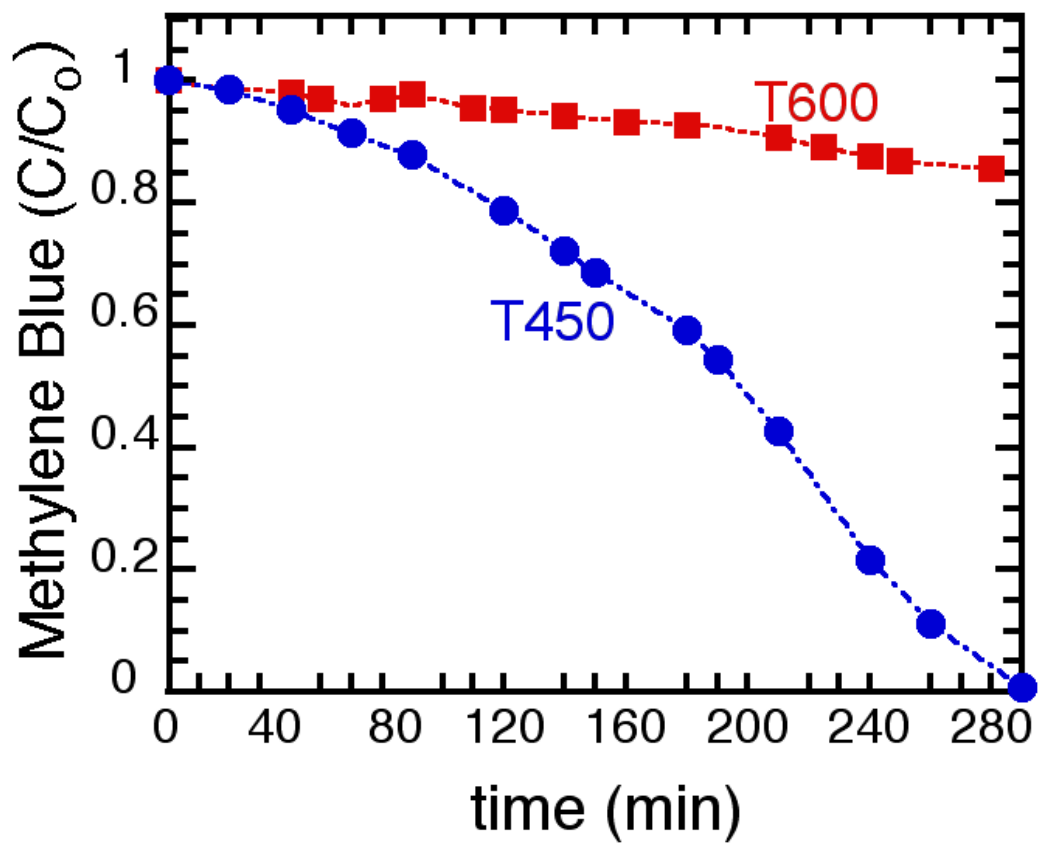

**Figure S9:** Comparison in the photodegradation of Methylene Blue between a 20 mg sample activated at 450°C and 600°C.

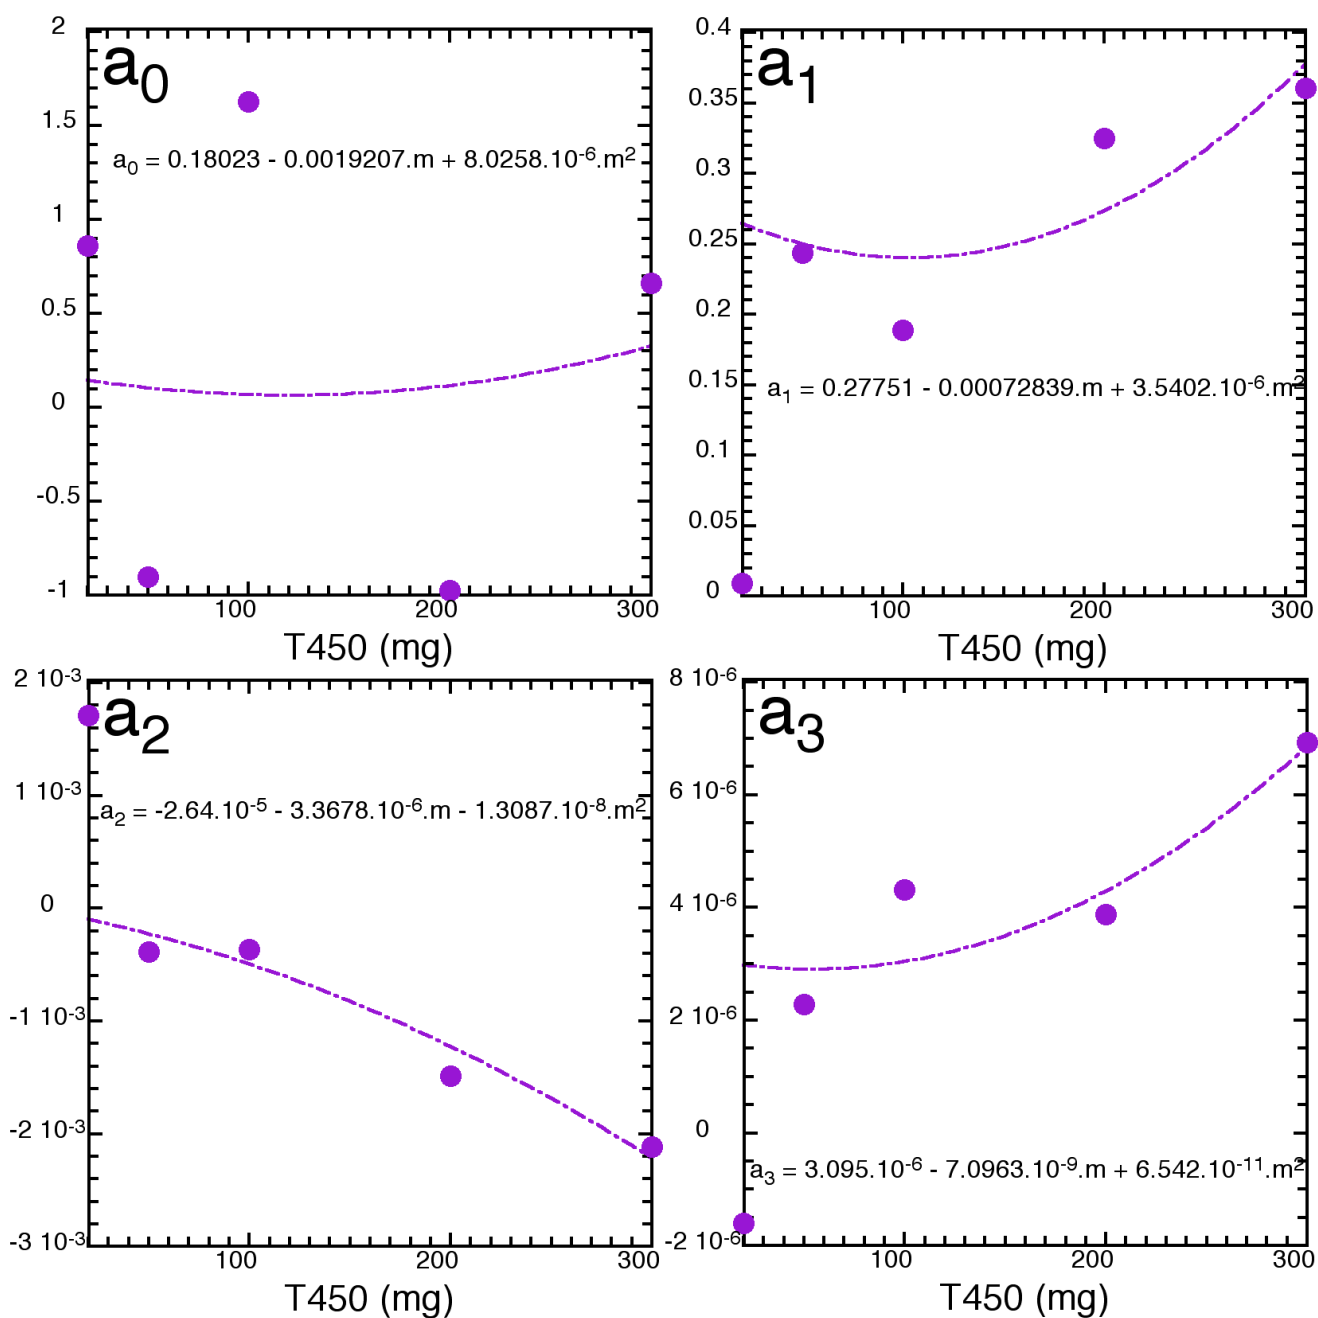

**Figure S10:** Values (dots) and 2<sup>nd</sup> order fit (dashed lines) of the polynomial parameters a<sub>0</sub>(m) to a<sub>3</sub>(m), with m the mass of T450, and the parameters a<sub>0</sub>(m) to a<sub>3</sub>(m) being the variable of the 3<sup>rd</sup> order degree polynomial [% (degrad) = a<sub>0</sub>(m) + a<sub>1</sub>(m).t + a<sub>2</sub>(m).t<sup>2</sup> + a<sub>3</sub>(m).t<sup>3</sup>].

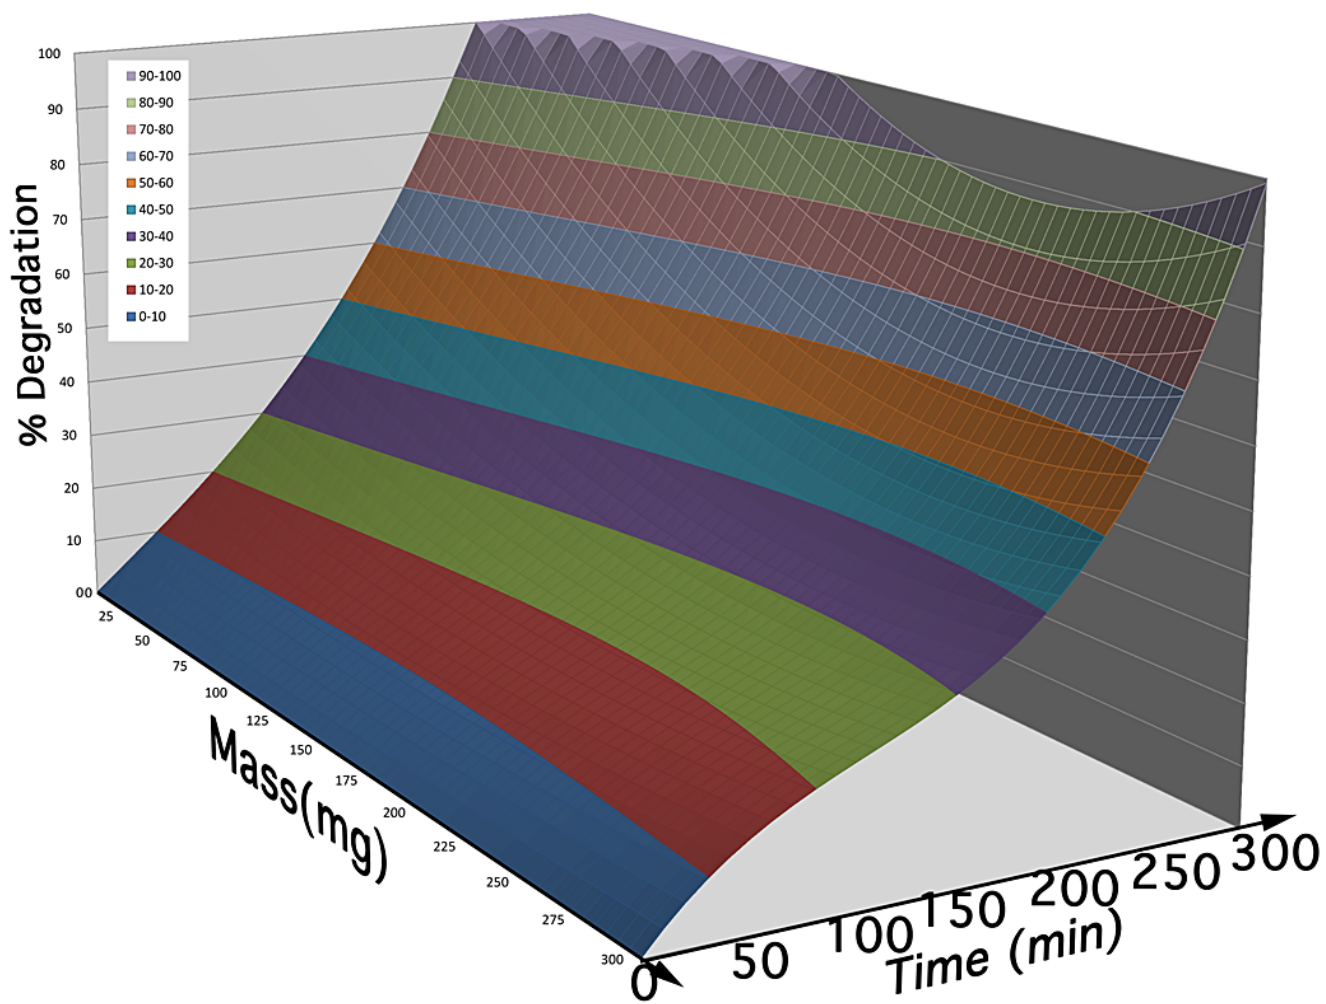

**Figure S11:** Modelling of the MB Degradation as a function of time (0 to 300 min) and mass (5 to 300 mg), for the T450 sample.

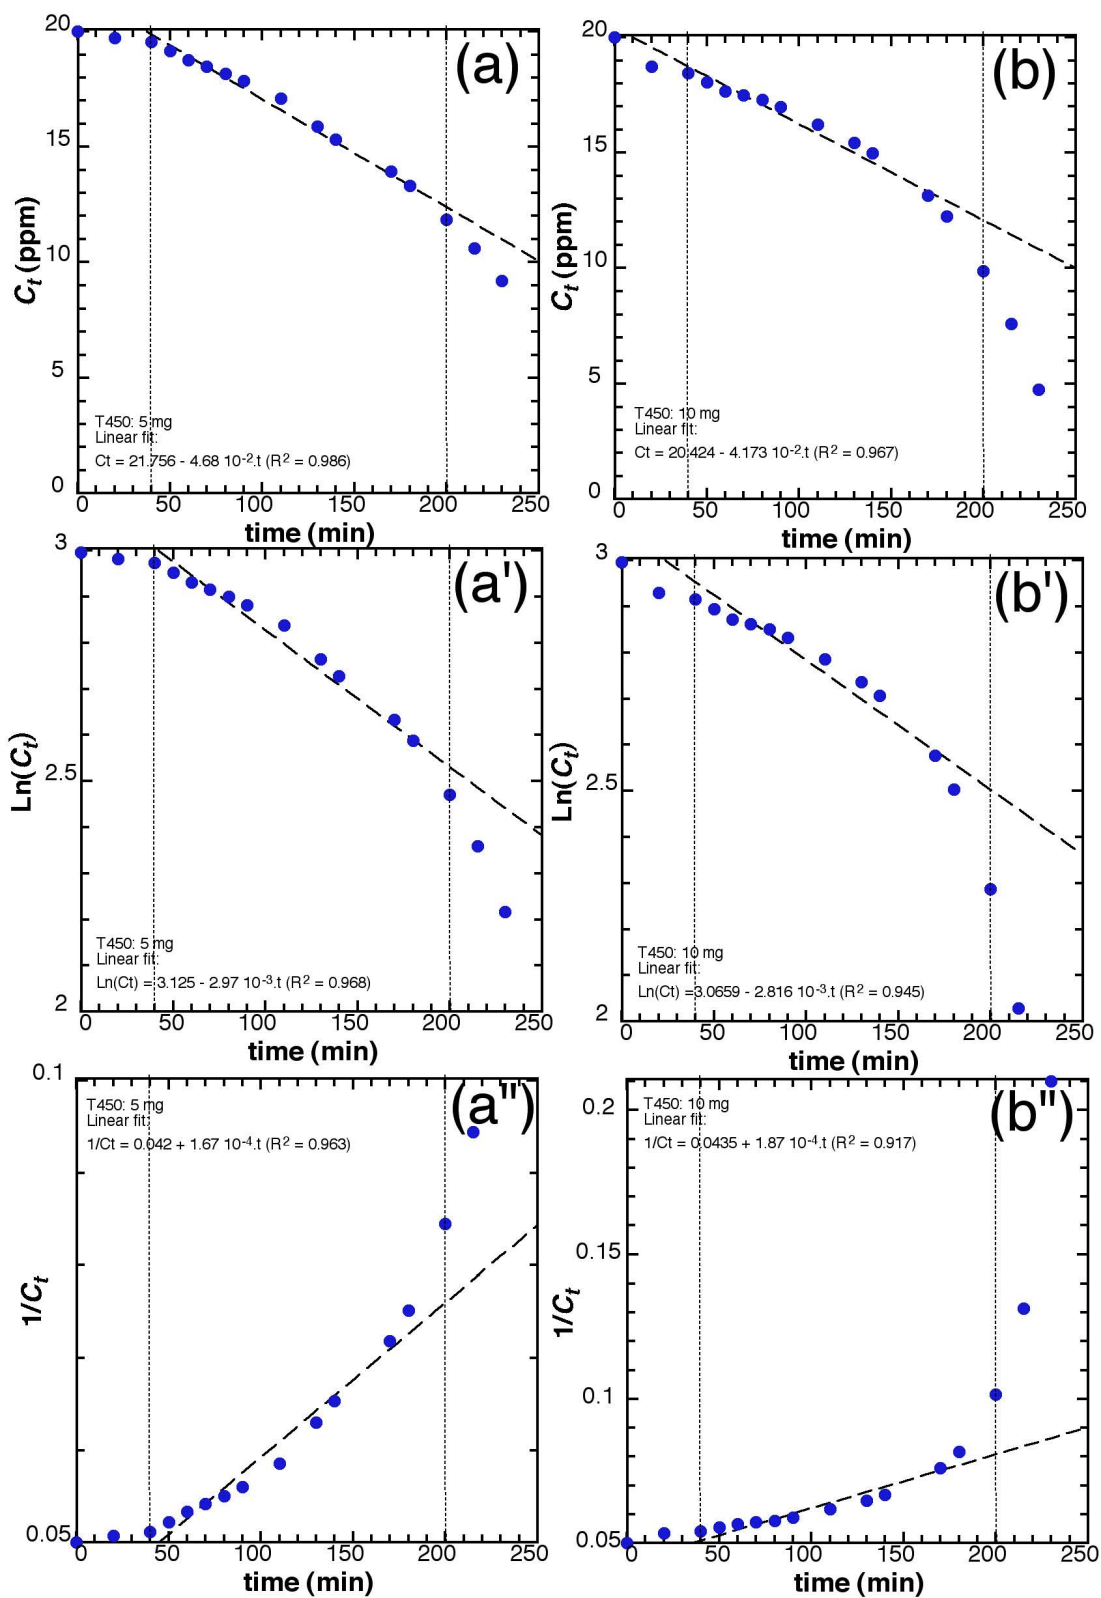

**Figure S12-A:** Linear fitting of the evolution of MB (in ppm) for the different kinetics models ( $C_t=f(t)$  - zero order;  $\ln(C_t)=f(t)$  - first order;  $1/C_t=f(t)$  - second order) for 5mg of (a; a'; a'') and 10 mg (b, b', b'') of T450.

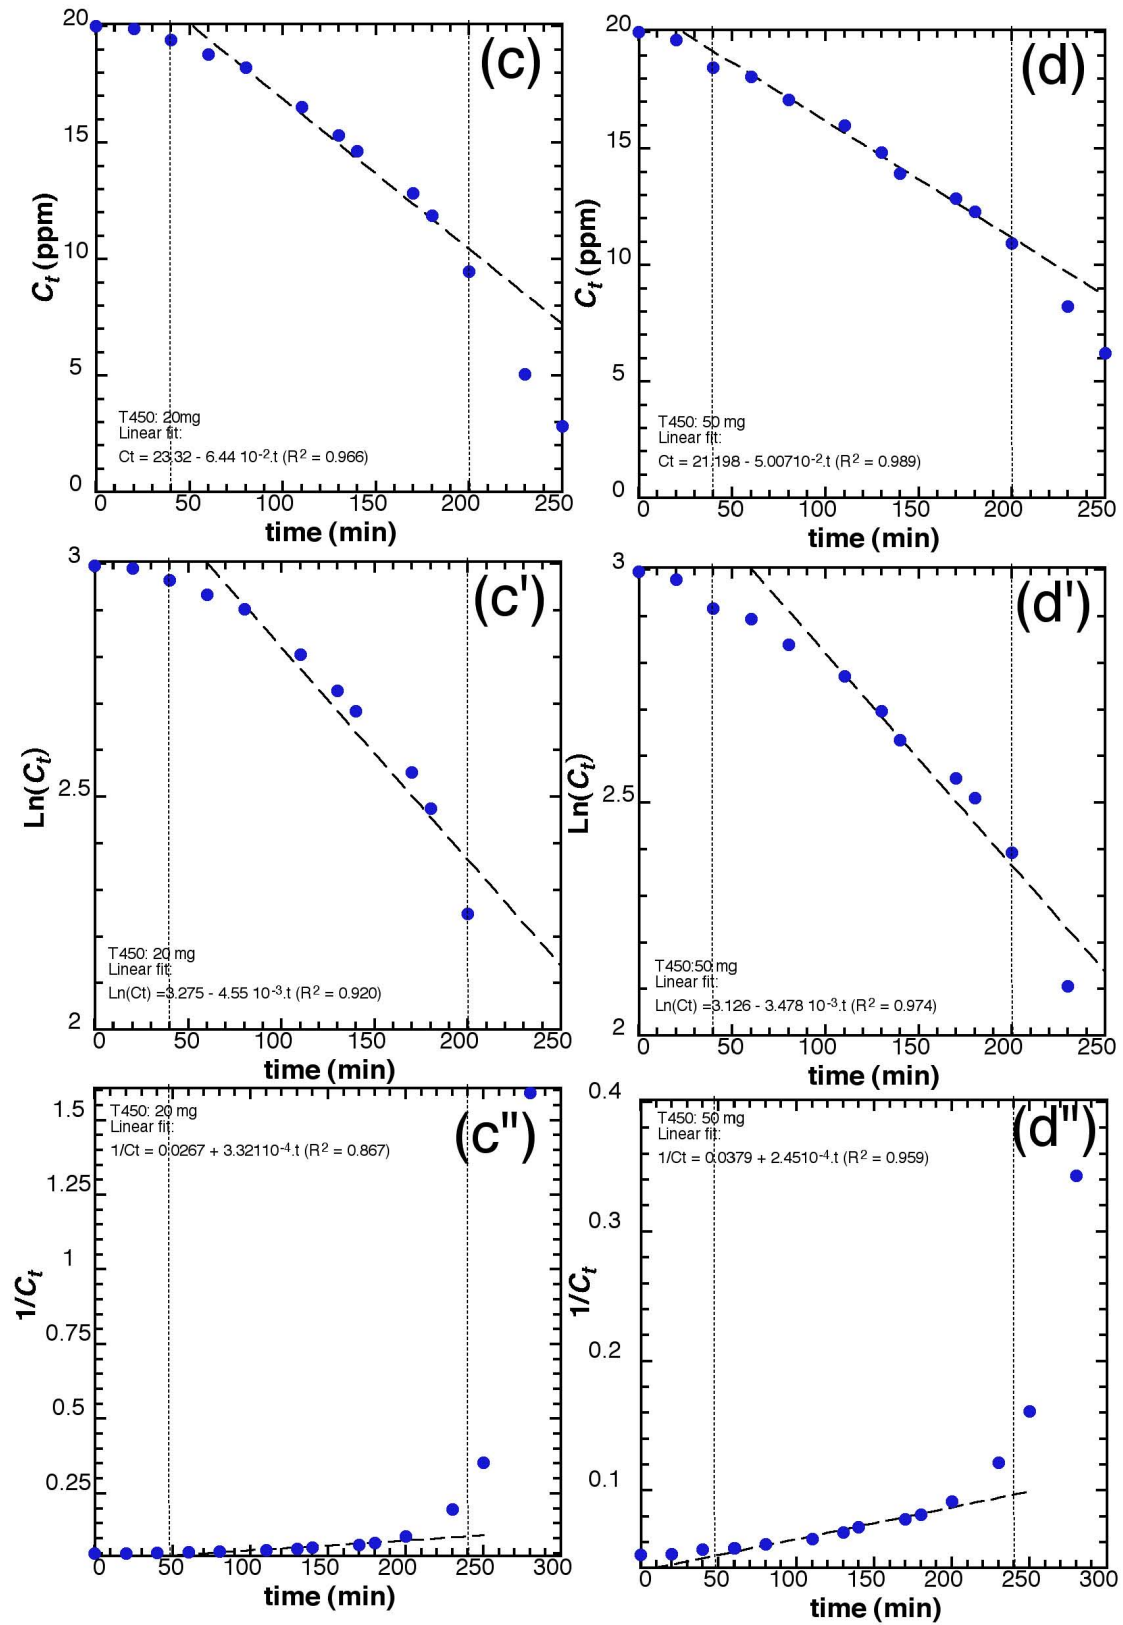

**Figure S12-B:** Linear fitting of the evolution of MB (in ppm) for the different kinetics models (Ct=f(t) - zero order; Ln(Ct)=f(t) - first order; 1/Ct=f(t) - second order) for 20mg of (c; c'; c'') and 50 mg (d, d', d'') of T450.

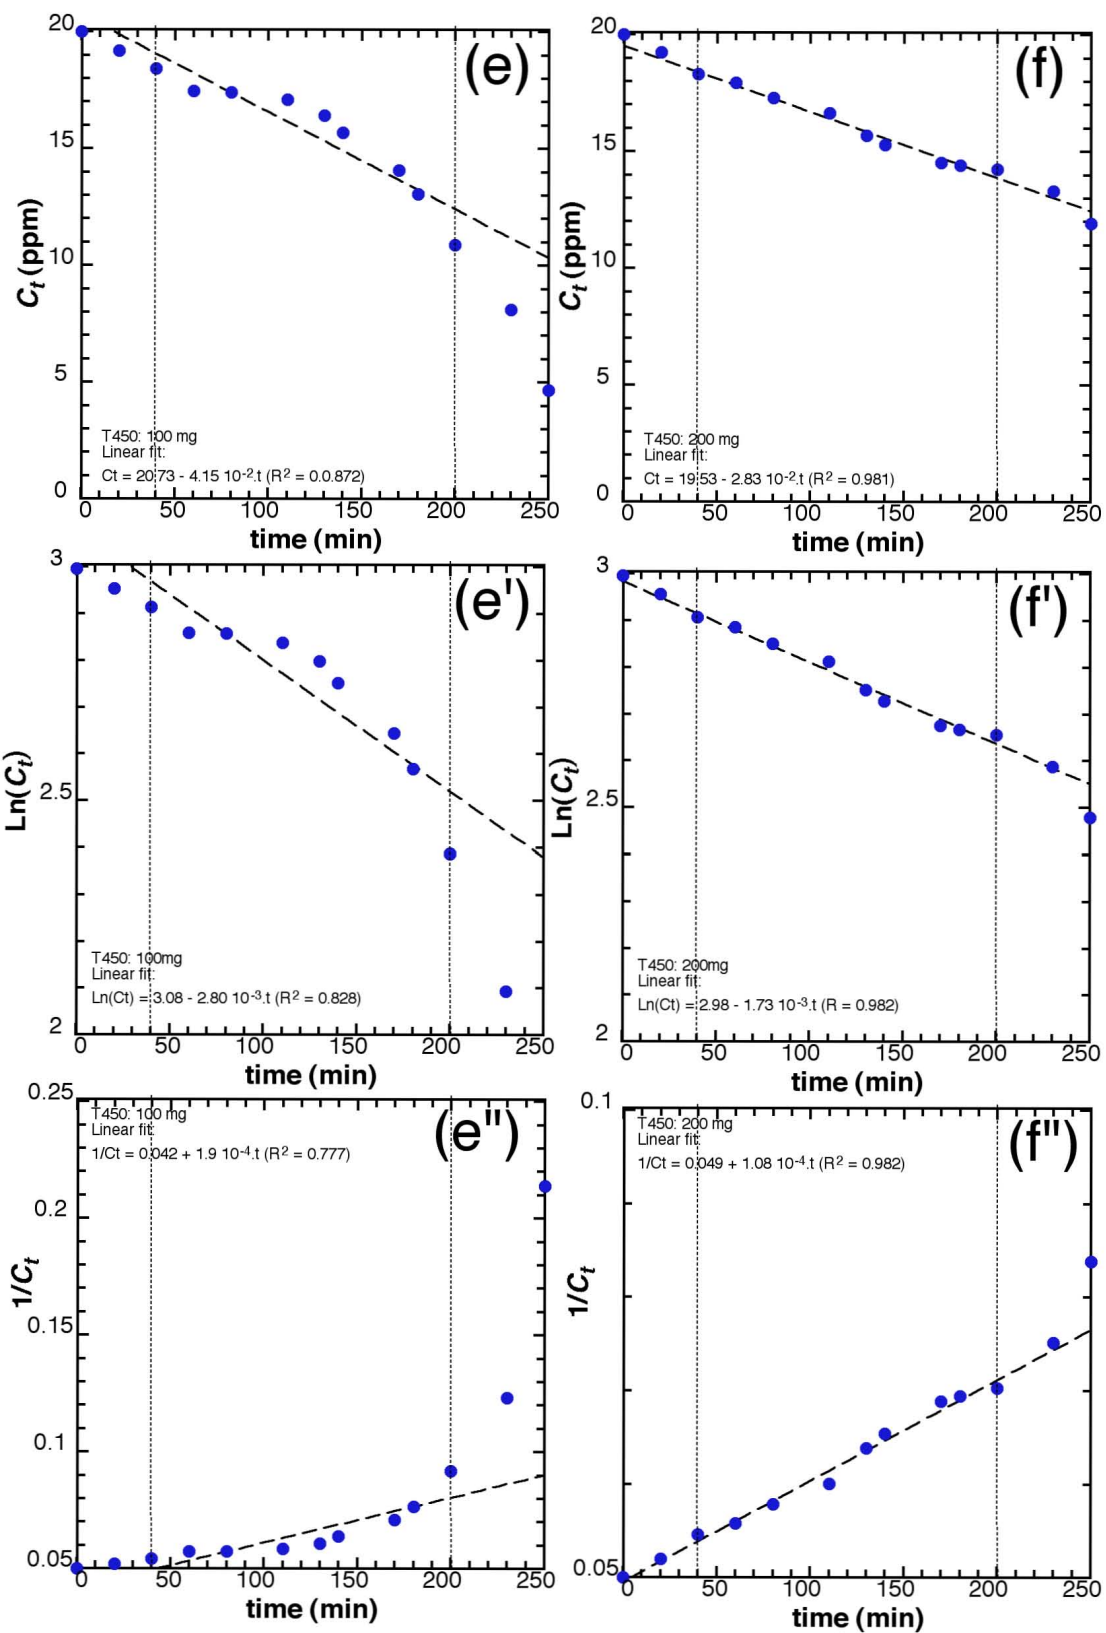

**Figure S12-C:** Linear fitting of the evolution of MB (in ppm) for the different kinetics models (Ct=f(t) - zero order; Ln(Ct)=f(t) - first order; 1/Ct=f(t) - second order) for 5mg of (e, e', e'') and 200 mg (f, f', f'') of T450.

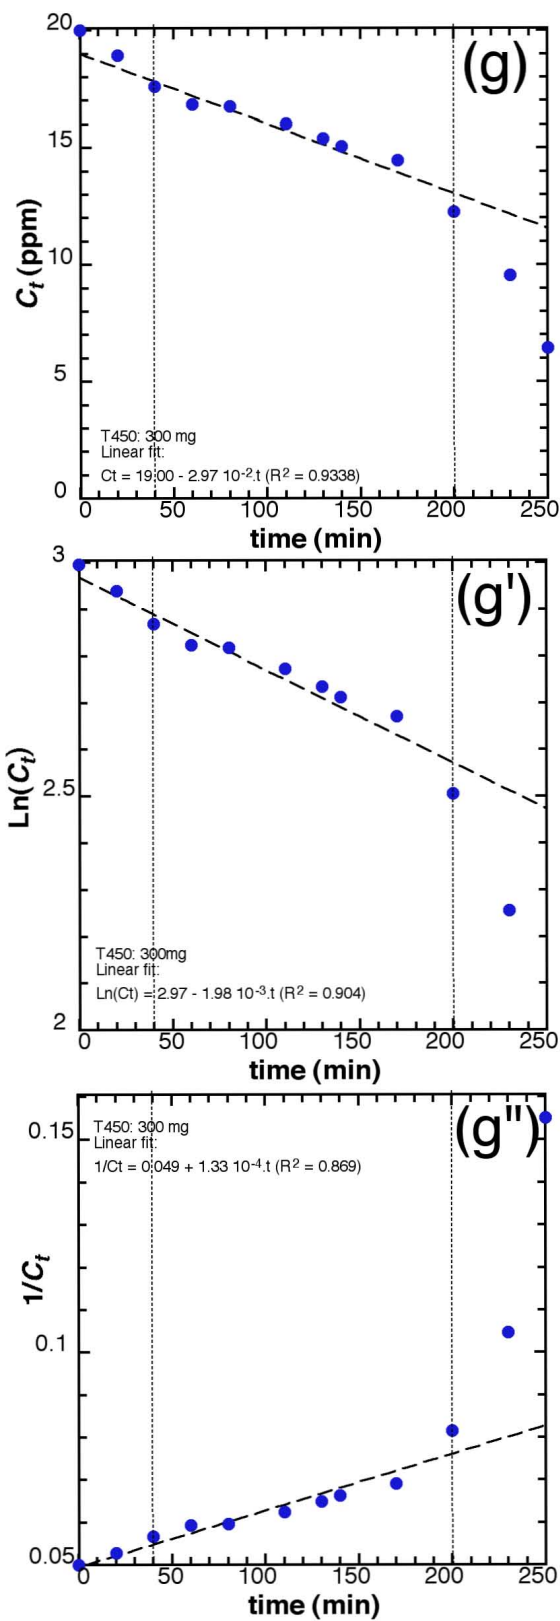

**Figure S12-D:** Linear fitting of the evolution of MB (in ppm) for the different kinetics models ( $C_t=f(t)$  - zero order;  $\ln(C_t)=f(t)$  - first order;  $1/C_t=f(t)$  - second order) for 300mg of (g; g'; g'') of T450.



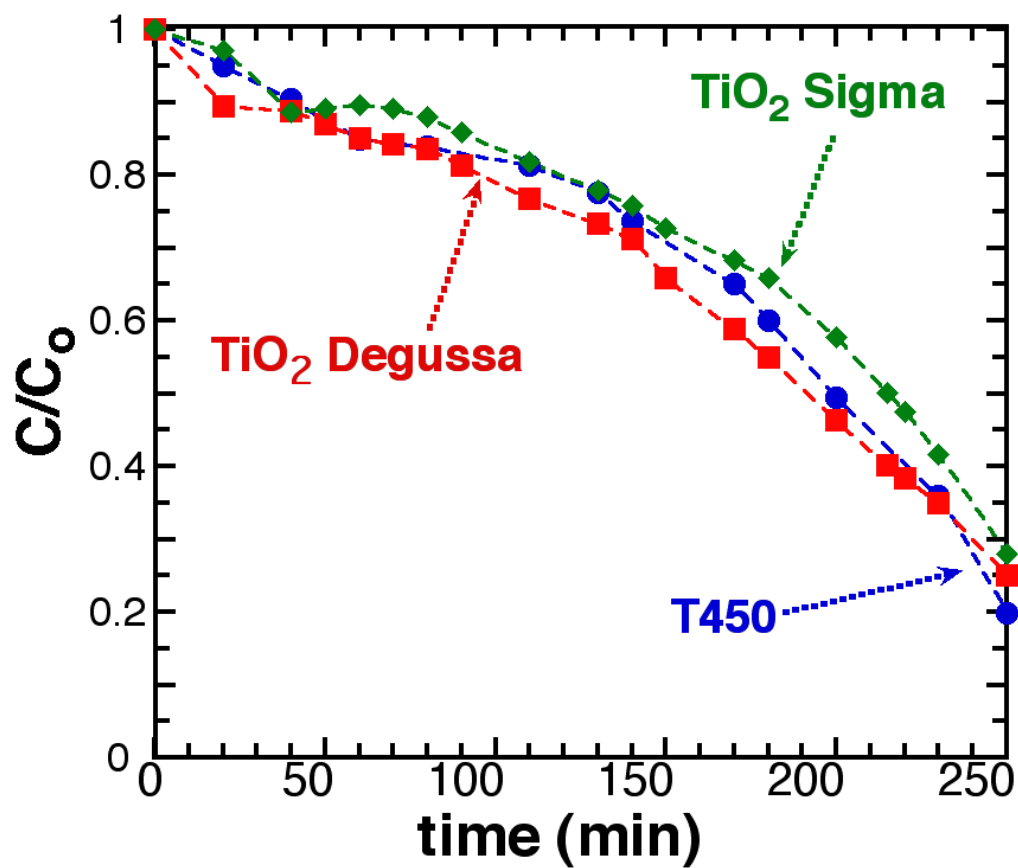

**Figure S13:** Comparison of the evolution of the concentration in Methylene Blue for TiO<sub>2</sub> Sigma, TiO<sub>2</sub> Degussa, and T450 (experimental conditions: 100 mg material in 25 mL, pH 6, MB: 20 ppm).

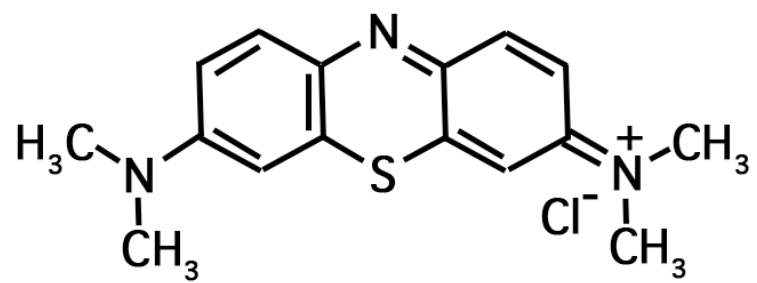

**Scheme S1:** Structure of Methylene Blue
